# Supplementary material for: Pancreatic family history does not predict disease progression but connotes alcohol consumption in adolescents and young adults with acute pancreatitis: Analysis of an international cohort of 2,335 patients
Source: Frontiers journal article supplement (doi:10.3389/fmed.2022.801592), 2022-09-12
Supplement: Data_Sheet_1.pdf [file Data_Sheet_1.pdf]

## Supplementary material

**Manuscript title: Pancreatic family history doesn't predict disease progression, but connotes alcohol consumption in adolescents and young adults with acute pancreatitis: Analysis of an international cohort of 2,335 patients.**

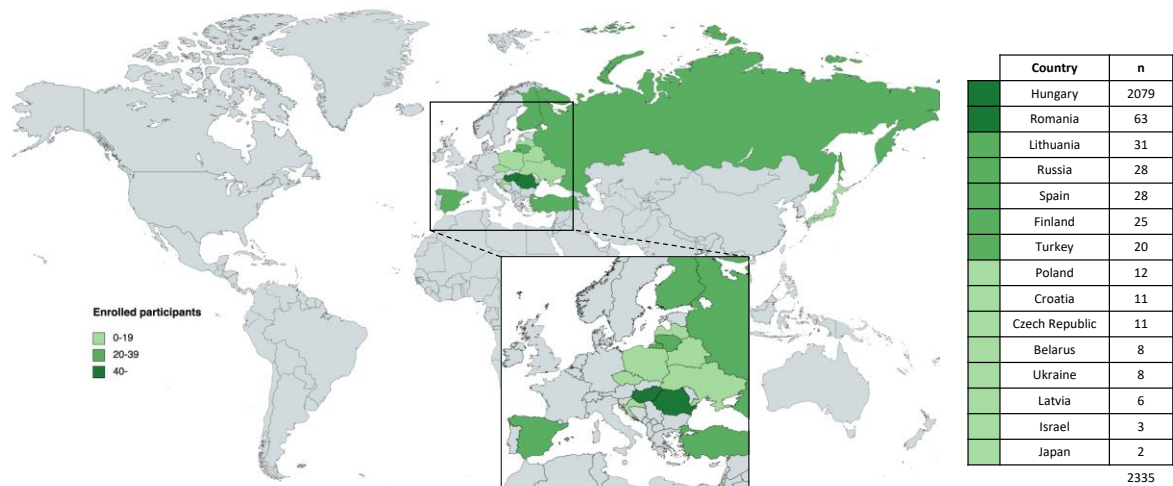

*Supplementary Figure 1: Distribution of participant enrolment in countries involved. n: number of enrolled participants.*

| Country        | City        | Institution                                                   | n   |
|----------------|-------------|---------------------------------------------------------------|-----|
| Belarus        | Gomel       | Gomel Regional Clinical Hospital                              | 8   |
| Croatia        | Rijeka      | Clinical Hospital Center Rijeka                               | 11  |
| Czech Republic | Ostrava     | Vítkovice Hospital                                            | 11  |
| Finland        | Helsinki    | Helsinki University Central Hospital                          | 25  |
| Hungary        | Békéscsaba  | Dr. Réthy Pál Hospital                                        | 67  |
|                |             | Bethesda Children's Hospital                                  | 3   |
|                |             | Bajcsy-Zsilinszky Hospital                                    | 113 |
|                |             | Buda Hospital of the Hospitaller Order of Saint John of God   | 6   |
|                |             | First Department of Pediatrics, Semmelweis University         | 9   |
|                |             | Pál Heim National Pediatric Institute                         | 10  |
|                |             | Second Department of Internal Medicine, Semmelweis University | 2   |
|                |             | Second Department of Pediatrics, Semmelweis University        | 3   |
|                | Debrecen    | Department of Internal Medicine, University of Debrecen       | 165 |
|                |             | Department of Surgery, University of Debrecen                 | 5   |
|                | Gyula       | Pándy Kálmán Hospital of County Békés                         | 31  |
|                | Kecskemét   | Bács-Kiskun County University Teaching Hospital               | 10  |
|                | Kiskunhalas | Kiskunhalas Semmelweis Hospital                               | 1   |
|                | Makó        | Healthcare Center of County Csongrád                          | 10  |

|                                     |                    |                                                                            |             |
|-------------------------------------|--------------------|----------------------------------------------------------------------------|-------------|
|                                     | Miskolc            | Borsod-Abaúj-Zemplén County Hospital and University Teaching Hospital      | 19          |
|                                     | Pécs               | Department of Pediatrics, University of Pécs                               | 9           |
|                                     |                    | First Department of Medicine, University of Pécs                           | 794         |
|                                     | Szeged             | Albert Szent-Györgyi Clinical Center of Pediatrics and Child Health Centre | 8           |
|                                     |                    | First Department of Medicine, University of Szeged                         | 299         |
|                                     |                    | Second Department of Medicine, University of Szeged                        | 81          |
|                                     |                    | Department of Anaesthesiology and Intensive Therapy, University of Szeged  | 12          |
|                                     | Székesfehérvár     | Szent György University Teaching Hospital of County Fejér                  | 380         |
|                                     | Szentes            | Dr. Bugyi István Hospital                                                  | 21          |
|                                     | Szombathely        | Markusovszky University Teaching Hospital                                  | 19          |
|                                     | Zalaegerszeg       | St. Rafael Hospital of Zala County                                         | 2           |
| Israel                              | Jerusalem          | Hadassah Hospital                                                          | 3           |
| Japan                               | Tokyo              | Keio University                                                            | 2           |
| Latvia                              | Riga               | Pauls Stradiņš Clinical University Hospital                                | 6           |
| Lithuania                           | Vilnius            | Vilnius University Hospital Santariskiu Klinikos                           | 31          |
| Poland                              | Kraków             | Jagiellonian University Medical College                                    | 12          |
| Romania                             | Bucharest          | Central Military Emergency Hospital "Dr Carol Davila"                      | 1           |
|                                     |                    | Grigore Alexandrescu Children`s Hospital, Carol Davila University          | 8           |
|                                     | Targu Mures        | Mures County Emergency Hospital                                            | 54          |
| Russia                              | St. Petersburg     | Saint Luke Clinical Hospital                                               | 28          |
| Spain                               | Sant Pere de Ribes | General Surgery, Consorci Sanitari del Garrof                              | 28          |
| Turkey                              | Istanbul           | Hospital of Bezmialem Vakif University, School of Medicine, Istanbul       | 20          |
| Ukraine                             | Kiev               | Bogomolets National Medical University                                     | 8           |
| <b>Total number of participants</b> |                    |                                                                            | <b>2335</b> |

*Supplementary Table 1: Distribution of centers and enrolled participants. n: number of participants*

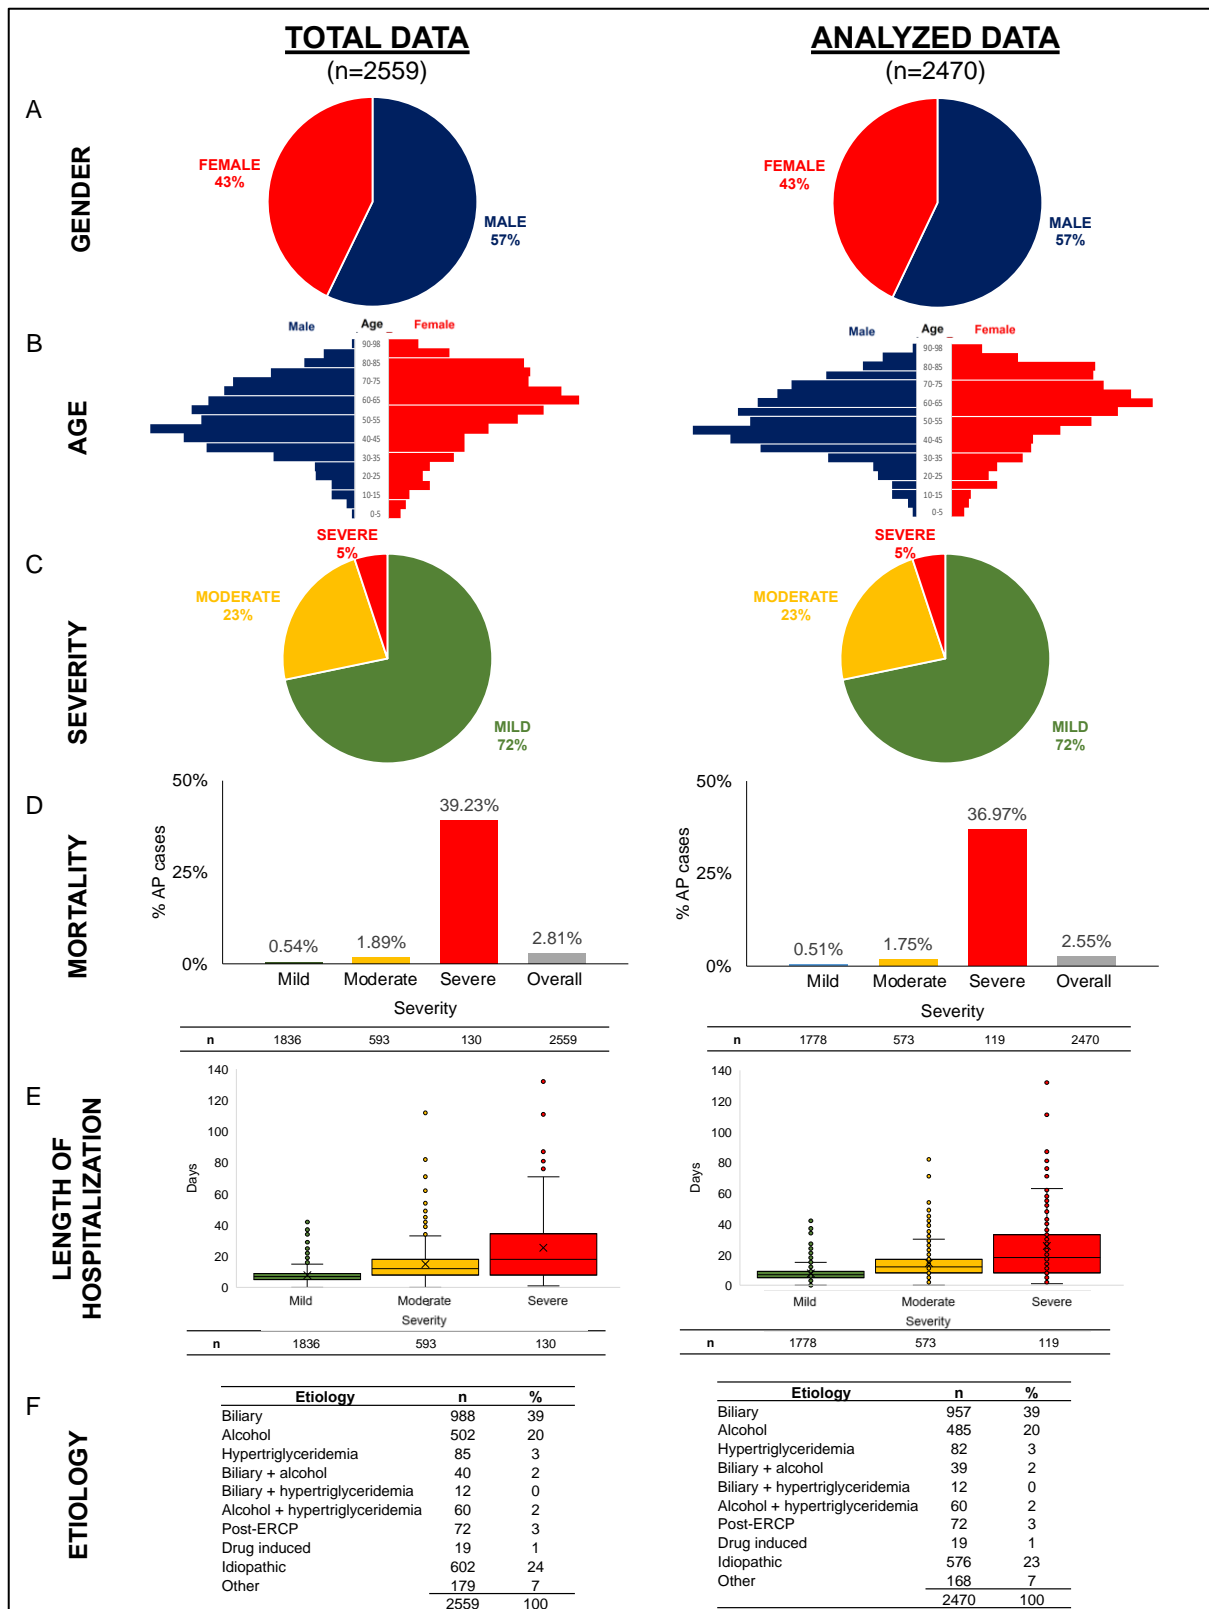

*Supplementary Figure 2: Representativeness. We compared the enrolled AP cases in our examined cohort (those with data on the presence of pancreatic family history) to an average AP population (all the patients in the AP registry). Our cohort was representative in terms of gender, age, AP severity, mortality, length of hospitalization and AP etiology – quite understandably, since almost all patients had data on the presence of pancreatic diseases in their respective families. n: total number of participants with data on the examined variable*

| <b>EPIDEMIOLOGY, ETIOLOGY</b> | <b>OVERALL</b> | <b>UPLOADED DATA</b> | <b>%</b>   |
|-------------------------------|----------------|----------------------|------------|
| Age                           | 2470           | 2470                 | 100        |
| Gender                        | 2470           | 2470                 | 100        |
| Etiology                      | 2470           | 2470                 | 100        |
| <i>Average uploaded data</i>  | <i>7410</i>    | <i>7410</i>          | <i>100</i> |

| <b>PERSONAL AND FAMILY MEDICAL HISTORY</b>        | <b>OVERALL</b> | <b>UPLOADED DATA</b> | <b>%</b>  |
|---------------------------------------------------|----------------|----------------------|-----------|
| Acute pancreatitis in the personal history        | 2470           | 2470                 | 100       |
| Number of previous episodes among recurrent cases | 517            | 483                  | 93        |
| Chronic pancreatitis in the personal history      | 2470           | 2470                 | 100       |
| History of diabetes mellitus                      | 2470           | 2466                 | 100       |
| History of non-transient dyslipidemia             | 2470           | 2118                 | 86        |
| Family history of pancreatic diseases             | 2470           | 2470                 | 100       |
| <i>Average uploaded data</i>                      | <i>12867</i>   | <i>12477</i>         | <i>97</i> |

| <b>RISK FACTORS</b>          | <b>OVERALL</b> | <b>UPLOADED DATA</b> | <b>%</b>   |
|------------------------------|----------------|----------------------|------------|
| Alcohol consumption          | 2470           | 2464                 | 100        |
| Smoking                      | 2470           | 2464                 | 100        |
| <i>Average uploaded data</i> | <i>4940</i>    | <i>4928</i>          | <i>100</i> |

| <b>OUTCOMES</b>                          | <b>OVERALL</b> | <b>UPLOADED DATA</b> | <b>%</b>   |
|------------------------------------------|----------------|----------------------|------------|
| Severity (mild/moderately severe/severe) | 2470           | 2470                 | 100        |
| Mortality                                | 2470           | 2470                 | 100        |
| <i>Average uploaded data</i>             | <i>4940</i>    | <i>4940</i>          | <i>100</i> |

---

|              |              |              |           |
|--------------|--------------|--------------|-----------|
| <b>TOTAL</b> | <b>30157</b> | <b>29755</b> | <b>99</b> |
|--------------|--------------|--------------|-----------|

*Supplementary Table 2: Data quality*

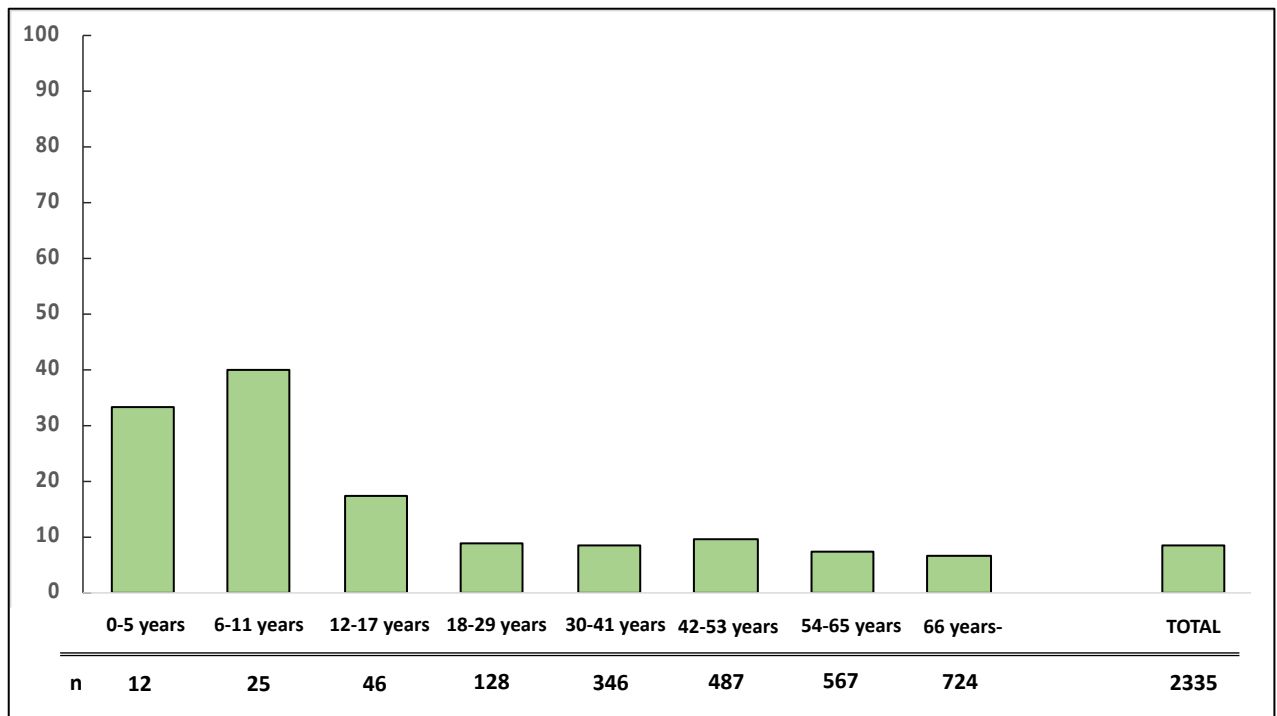

Supplementary Figure 3: Rate of participants with positive pancreatic family history in each age subgroup. n: total number of participants with data on the examined variable.

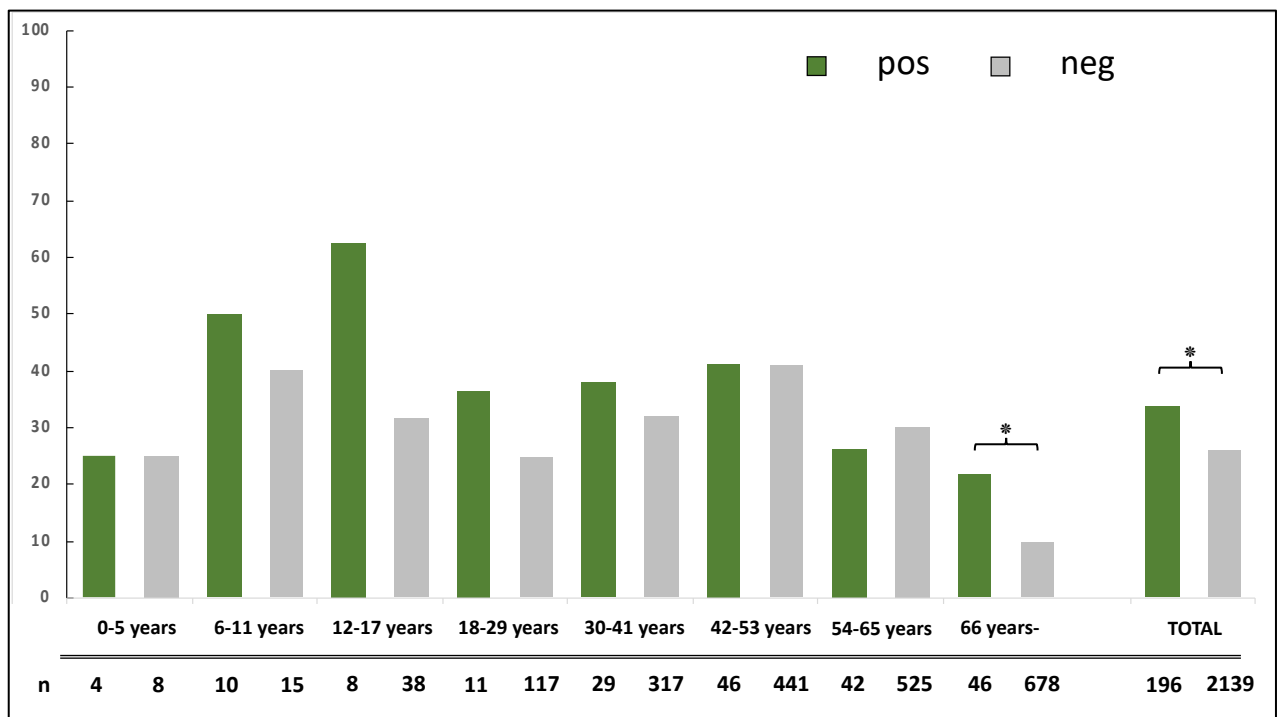

Supplementary Figure 4: Height of bars indicate the rate of acute recurrent pancreatitis and/or chronic pancreatitis in acute pancreatitis patients with positive and negative pancreatic family history, according to their age at the time of the index enrolment in our registry. Star sign indicates statistically significant difference between positive and negative pancreatic family history groups ( $<0.05$ ). n: total number of participants with data on the examined variable; pos: positive pancreatic family history group; neg: negative pancreatic family history group.
